# Supplementary material for: Health-related selection into employment among the unemployed
Source: Springer Nature journal article supplement (doi:10.1186/s12889-022-13023-0), 2022-04-05
Supplement: MOESM2 [file 20286414]

---

Additional file 2 Categories of International Classification of Diseases Revisions 10 main diagnoses for hospitalization and Prescription Register's special reimbursement utilized in the study

---

| Aspects of health, specific health conditions         | Specialized health care visit diagnoses                                                                                        | Special reimbursement category                                                                                                                       |
|-------------------------------------------------------|--------------------------------------------------------------------------------------------------------------------------------|------------------------------------------------------------------------------------------------------------------------------------------------------|
| Any alcohol use-related conditions, poisonings        | F10-F16, F18, F19, G312, G4051, G621, G721, I426, K292, K70, K852, K860, O354, P043, Q860, T40, X42, X45, F10-F19              |                                                                                                                                                      |
| Any mental health, self-harm                          | F20-F69, X60-X84, Y87.0                                                                                                        |                                                                                                                                                      |
| Any accidents, violence                               | T25-T29, T41-T65, V01-X41, X43, X44, X46-X59, Y10-Y15, Y85-Y86, W00-W99, X85-Y09, Y87.1                                        |                                                                                                                                                      |
| Any physical conditions, excluding alcoholic diseases | A00-B99, C00-D48, E00-E90, I00-I425, I427-I99, J00-J64, J66-J99, K00-K93, L00-L99, M00-M99, N00-N99, P00-P99, Q00-Q99, R00-R94 |                                                                                                                                                      |
| Cancer                                                | C00-C97                                                                                                                        | Breast (115), prostatic (116), gynecological (128), other malignant tumors (130), melanoma, renal cancer (180)                                       |
| Diabetes                                              | E10-E14                                                                                                                        | Diabetes (103)                                                                                                                                       |
| Neurological conditions                               | G00-G19, G20-G99                                                                                                               | Parkinson's disease (110), epilepsy (111), multiple sclerosis (109), apoplectic symptoms (108), trigeminusneuralgia, glossofaryngikusneuralgia (119) |
| Heart disease                                         | I00-I09, I20-I52                                                                                                               | Cardiac insufficiency (201), coronary heart disease (206), arrhythmia (207)                                                                          |

---
